# Supplementary material for: Neighborhood Incarceration Rates and Adverse Birth Outcomes in New York City, 2010-2014
Source: PubMed Central journal article supplement (PMC10066462; doi:10.1001/jamanetworkopen.2023.6173), 2023-03-31
Supplement: jamanetwopen-e236173-s001.pdf [file jamanetwopen-e236173-s001.pdf]

## Data Sharing Statement

Holaday. Neighborhood Incarceration Rates and Adverse Birth Outcomes in New York City, 2010-2014. *JAMA Netw Open*. Published March 31, 2023.

doi:10.1001/jamanetworkopen.2023.6173

### Data

**Data available:** Yes

**Data types:** Other (please specify)

**Additional Information:** Data are publicly available

**How to access data:** <https://www1.nyc.gov/site/doh/data/data-sets/vital-statistics-birth-micro-sas-datasets.page>

**When available:** With publication

### Supporting Documents

**Document types:** None

### Additional Information

**Who can access the data:** anyone requesting the data

**Types of analyses:** for any purpose

**Mechanisms of data availability:** without investigator support
